# Supplementary material for: Association of the Reproductive Period with Decreased Estimated Glomerular Filtration Rate in Menopausal Women: A Study from the Shanghai Suburban Adult Cohort and Biobank (2016–2020)
Source: MDPI journal article supplement (doi:10.3390/ijerph181910451), 2021-10-05
Supplement: s1 [file s1]

**Supplement Table S1.** eGFR categories in menopausal women with different length reproductive period at follow-up.

| Variables    | Total<br>(N=5503) | Length of reproductive period (years) |                    |                    |                    |                    | P      |
|--------------|-------------------|---------------------------------------|--------------------|--------------------|--------------------|--------------------|--------|
|              |                   | Q1: 18-31 (N=1103)                    | Q2: 31-33 (N=1105) | Q3: 33-35 (N=1098) | Q4: 35-37 (N=1102) | Q5: 37-45 (N=1095) |        |
| eGFR (mg/dL) |                   |                                       |                    |                    |                    |                    | <0.001 |
| ≥90          | 2620<br>(47.6%)   | 464 (42.1%)                           | 467 (42.1%)        | 573 (52.1%)        | 563 (51.1%)        | 553 (50.7%)        |        |
| 60-89        | 2691<br>(48.9%)   | 574 (52.1%)                           | 602 (54.2%)        | 499 (45.4%)        | 507 (46.0%)        | 509 (46.7%)        |        |
| 45-59        | 168 (3.0%)        | 54 (4.9%)                             | 36 (3.2%)          | 26 (2.4%)          | 28 (2.5%)          | 24 (2.2%)          |        |
| 30-44        | 23 (0.4%)         | 8 (0.7%)                              | 5 (0.5%)           | 2 (0.2%)           | 3 (0.3%)           | 5 (0.5%)           |        |
| 15-29        | 1 (2%)            | 1 (0.1%)                              | 0 (0.0%)           | 0 (0.0%)           | 0 (0.0%)           | 0 (0.0%)           |        |

eGFR, estimated glomerular filtration rate. Data were expressed as median (range) or n(%). P-values were calculated using Kruskal, Wallis rank test, Pearson  $\chi^2$  test.
